# Supplementary material for: Changes in nucleosome position at transcriptional start sites of specific genes in Zea mays mediator of paramutation1 mutants
Source: PubMed Central journal article supplement — Epigenetics. 2013 Mar 28;8(4):398–408. doi: 10.4161/epi.24199 (PMC3674049; doi:10.4161/epi.24199), 2013-03-28
Supplement: epi-8-398-s01.pdf [file epi-8-398-s01.pdf]

## **Supplemental Material to:**

**Jonathan Labonne, Jane Dorweiler and Karen McGinnis**

**Changes in nucleosome position at transcriptional  
start sites of specific genes in Zea mays mediator of  
paramutation1 mutants**

**Epigenetics 2012; 8(4)**

**<http://dx.doi.org/10.4161/epi.24199>**

**[http://www.landesbioscience.com/journals/epigenetics/  
article/24199/](http://www.landesbioscience.com/journals/epigenetics/article/24199/)**

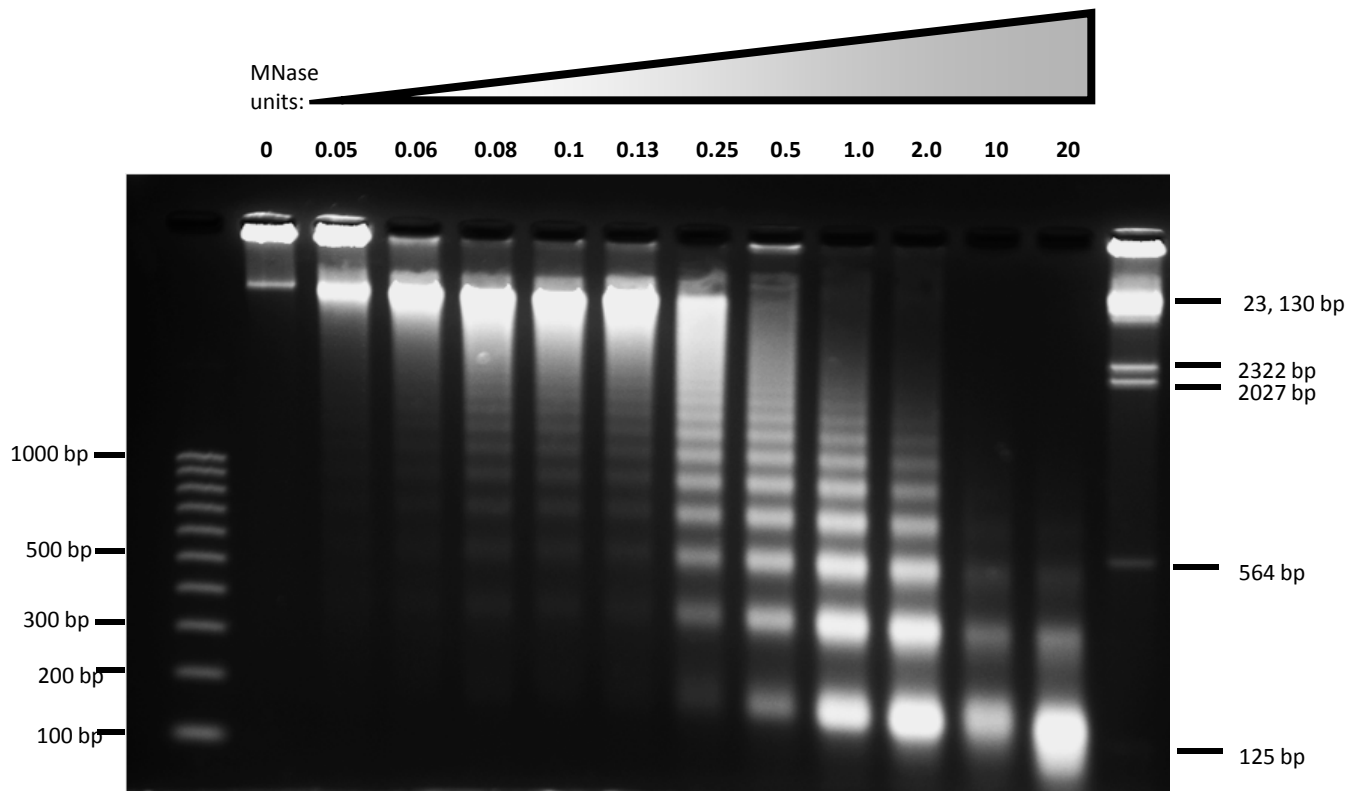

Figure S1: Agarose gel fractionation of micrococcal nuclease (MNase)-digested DNA from B73 ear shoot. The number of units of MNase per reaction increases from 0 to 20 units. The number of units used to digest the DNA in each lane is indicated at the top of the lane. The size of the molecular weight markers, loaded in the outermost lanes of the gel, is indicated in base pairs.

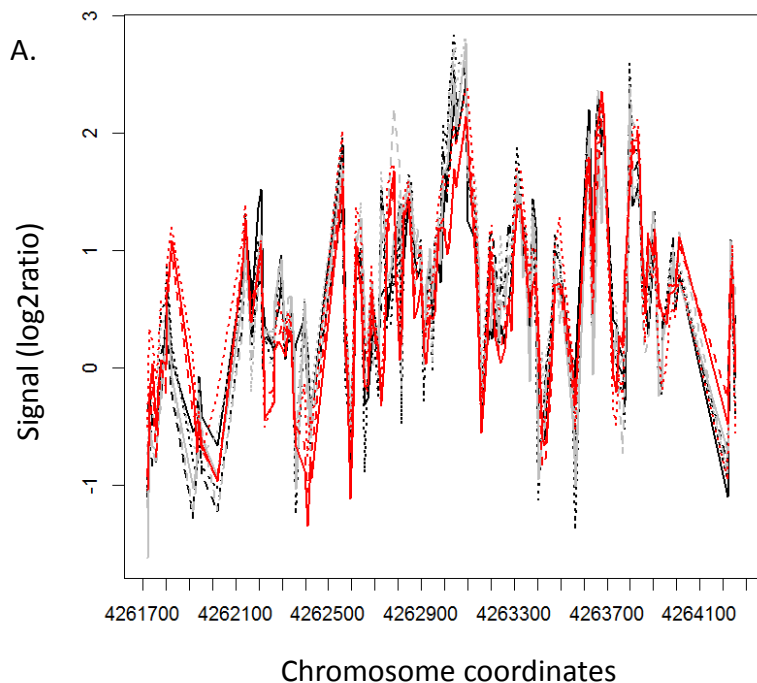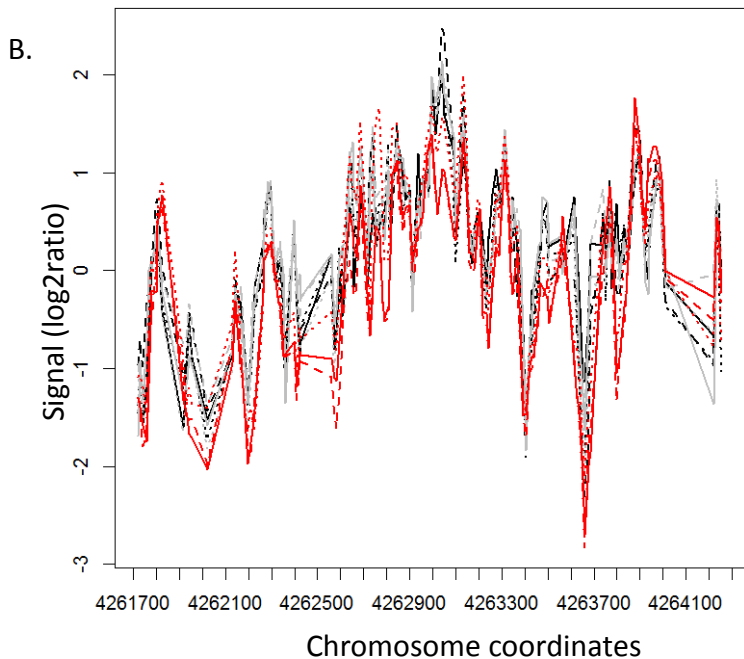

Figure S2. Nucleosome distribution across the TSS region of *liguleless1* in wild type (A) and mutant (B) individuals. Each line represents a separate biological replicate. The x-axis shows the coordinates along chromosome 2, and the y-axis represents the log<sub>2</sub> ratio of the signal intensity between the test (nucleosomal DNA) and reference (genomic DNA) samples. Red lines indicate ear shoot samples, grey lines represent immature tassel samples, and black lines represent leaf samples. The predicted transcriptional start site for this gene is at position 4,263,201.

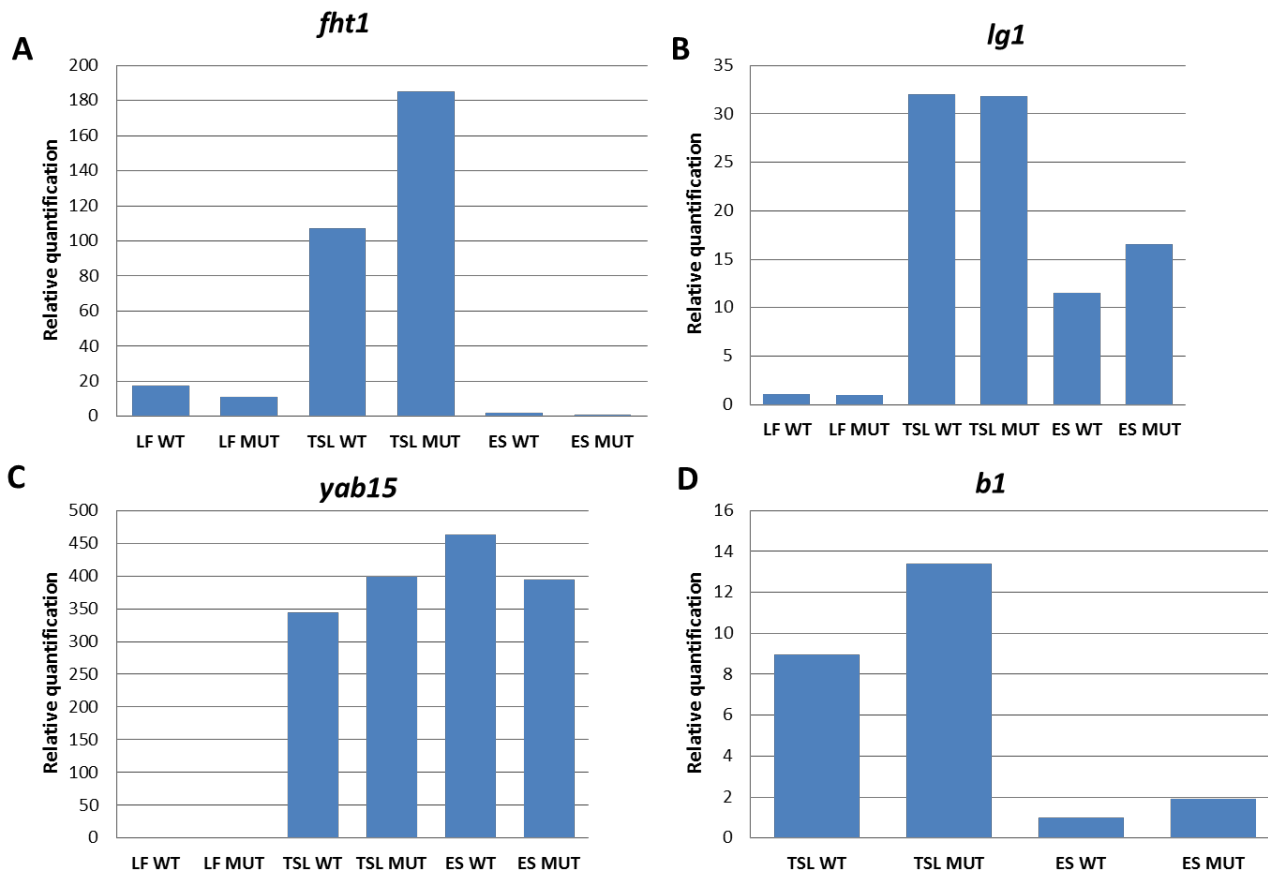

Figure S3. Real time PCR results for wild-type (WT) and mutant *mop1-1* (MUT) for *flavanone 3-hydroxylase1* (A) *liguleless1* (B) *yabby15* (C), and *colored plant1* (D). Transcript abundance was measured in leaf, tassel and earshoot of mutant (MUT) and wild type (WT) plants. Average relative quantification (Rq) is plotted on the y-axis, with each bar representing the average of three biological replicates (wild type ear shoot expression of *b1* set as a value of 1).

| Gene Symbol  | Gene Name                                    | GenBank ID | B73 refgen2 Gene Model | TSS (B73 RefGen2) | Zm Chr# | START    | STOP     | PROBE REGION (refgenv2) | Strand |
|--------------|----------------------------------------------|------------|------------------------|-------------------|---------|----------|----------|-------------------------|--------|
| <b>tub1</b>  | beta tubulin1                                | X52878     | GRMZM2G164696          | 2038186           | chr1    | 2036686  | 2039685  | chr1:2036686-2039685    | 1      |
| <b>cat2</b>  | catalase2                                    | X54819     | GRMZM2G090568          | 7162590           | chr1    | 7161090  | 7164089  | chr1:7161090-7164089    | -1     |
| <b>lls1</b>  | lethal leaf spot1                            | U77345     | GRMZM2G339563          | 10092334          | chr1    | 10090834 | 10093833 | chr1:10090834-10093833  | 1      |
| <b>rtcs1</b> | rootless concerning crown and seminal roots1 | EF051732   | GRMZM2G092542          | 10827541          | chr1    | 10826041 | 10829040 | chr1:10826041-10829040  | -1     |
| <b>ms26</b>  | male sterile26                               | AF366297   | GRMZM2G091822          | 14508661          | chr1    | 14507161 | 14510160 | chr1:14507161-14510160  | -1     |
| <b>vp5</b>   | viviparous5                                  | AF039585   | GRMZM2G410515          | 17660941          | chr1    | 17659441 | 17662440 | chr1:17659441-17662440  | 1      |
| <b>lpa1</b>  | low phytic acid1                             | AF323175   | GRMZM2G155242          | 25284139          | chr1    | 25282639 | 25285638 | chr1:25282639-25285638  | 1      |
| <b>gln6</b>  | glutamine synthetase6                        | X65926     | GRMZM2G050514          | 27981439          | chr1    | 27979939 | 27982938 | chr1:27979939-27982938  | -1     |
| <b>ibp2</b>  | initiator-binding protein2                   | X79086     | GRMZM2G110309          | 40352197          | chr1    | 40350697 | 40353696 | chr1:40350697-40353696  | 1      |
| <b>pdc3</b>  | pyruvate decarboxylase3                      | D14457     | GRMZM2G087186          | 45515978          | chr1    | 45514478 | 45517477 | chr1:45514478-45517477  | -1     |
| <b>ts2</b>   | tassel seed2                                 | L20621     | GRMZM2G455809          | 46678942          | chr1    | 46677442 | 46680441 | chr1:46677442-46680441  | 1      |
| <b>dek1</b>  | defective kernel1                            | AY061806   | GRMZM2G321753          | 47291535          | chr1    | 47290035 | 47293034 | chr1:47290035-47293034  | 1      |
| <b>rth3</b>  | roothair defective3                          | AY265855   | GRMZM2G377215          | 47504495          | chr1    | 47502995 | 47505994 | chr1:47502995-47505994  | 1      |
| <b>p1</b>    | pericarp color1                              | AY702552   | GRMZM2G057027          | 48097446          | chr1    | 48095946 | 48098945 | chr1:48095946-48098945  | -1     |
| <b>p2</b>    | pericarp color2                              | AF210617   | GRMZM2G084799          | 48117497          | chr1    | 48115997 | 48118996 | chr1:48115997-48118996  | 1      |
| <b>phyB1</b> | phytochromeB1                                | DQ307579   | GRMZM2G124532          | 50025637          | chr1    | 50024137 | 50027136 | chr1:50024137-50027136  | 1      |
| <b>cal3</b>  | calmodulin3                                  | X77396     | GRMZM2G152891          | 52095395          | chr1    | 52093895 | 52096894 | chr1:52093895-52096894  | 1      |
| <b>pki1</b>  | protein kinase inhibitor1                    | Z29643     | GRMZM2G018728          | 52810251          | chr1    | 52808751 | 52811750 | chr1:52808751-52811750  | -1     |
| <b>les22</b> | lesion22                                     | AF058763   | GRMZM2G044074          | 56558248          | chr1    | 56556748 | 56559747 | chr1:56556748-          | 1      |

|              |                                                  |          |               |           |      |           |           |                              |    |
|--------------|--------------------------------------------------|----------|---------------|-----------|------|-----------|-----------|------------------------------|----|
|              |                                                  |          |               |           |      |           |           | 56559747                     |    |
| <b>sod4</b>  | superoxide<br>dismutase4                         | X17565   | GRMZM2G169890 | 60145100  | chr1 | 60143600  | 60146599  | chr1:60143600-<br>60146599   | 1  |
| <b>ocl4</b>  | outer cell layer4                                | AJ250986 | GRMZM2G123140 | 100909663 | chr1 | 100908163 | 100911162 | chr1:100908163-<br>100911162 | -1 |
| <b>lpa2</b>  | low phytic acid2                                 | AY172635 | GRMZM2G456626 | 101832342 | chr1 | 101830842 | 101833841 | chr1:101830842-<br>101833841 | -1 |
| <b>rs2</b>   | rough sheath2                                    | AF143447 | GRMZM2G403620 | 154957201 | chr1 | 154955701 | 154958700 | chr1:154955701-<br>154958700 | -1 |
| <b>bsd2</b>  | bundle sheath<br>defective2                      | AF126742 | GRMZM2G062788 | 158313837 | chr1 | 158312337 | 158315336 | chr1:158312337-<br>158315336 | 1  |
| <b>bif2</b>  | barren<br>inflorescence2                         | EF532402 | GRMZM2G171822 | 173846756 | chr1 | 173845256 | 173848255 | chr1:173845256-<br>173848255 | 1  |
| <b>igl1</b>  | indole-3-glycerol<br>phosphate<br>lyase1         | U82201   | GRMZM2G402631 | 178008996 | chr1 | 178007496 | 178010495 | chr1:178007496-<br>178010495 | -1 |
| <b>zmm6</b>  | Zea mays<br>MADS6                                | AJ430692 | GRMZM2G159397 | 194013508 | chr1 | 194012008 | 194015007 | chr1:194012008-<br>194015007 | 1  |
| <b>sdh1</b>  | sorbitol<br>dehydrogenase<br>homolog1            | DQ191049 | GRMZM2G175423 | 197267922 | chr1 | 197266422 | 197269421 | chr1:197266422-<br>197269421 | 1  |
| <b>hm1</b>   | Helminthosporiu<br>m carbonum<br>susceptibility1 | L02540   | GRMZM5G881887 | 199754467 | chr1 | 199752967 | 199755966 | chr1:199752967-<br>199755966 | 1  |
| <b>kan1</b>  | KANADI1                                          | EU935003 | GRMZM2G056400 | 215611664 | chr1 | 215610164 | 215613163 | chr1:215610164-<br>215613163 | -1 |
|              | Permease                                         |          | GRMZM2G115635 | 219063550 | chr1 | 219062050 | 219065049 | chr1:219062050-<br>219065049 | 1  |
| <b>crs1</b>  | chloroplast RNA<br>splicing1                     | AY109620 | GRMZM2G078412 | 220991421 | chr1 | 220989921 | 220992920 | chr1:220989921-<br>220992920 | -1 |
| <b>yab10</b> | yabby<br>homolog10                               | AY313904 | GRMZM2G167824 | 225032510 | chr1 | 225031010 | 225034009 | chr1:225031010-<br>225034009 | 1  |
| <b>mdh5</b>  | malate<br>dehydrogenase5                         | T18819   | GRMZM2G415359 | 231341950 | chr1 | 231340450 | 231343449 | chr1:231340450-<br>231343449 | -1 |
| <b>mdh4</b>  | malate<br>dehydrogenase4                         | AA051891 | GRMZM2G415359 | 231341950 | chr1 | 231340450 | 231343449 | chr1:231340450-<br>231343449 | -1 |
| <b>id1</b>   | indeterminate<br>growth1                         | AF058757 | GRMZM2G011357 | 239612267 | chr1 | 239610767 | 239613766 | chr1:239610767-<br>239613766 | -1 |
| <b>an1</b>   | anther ear1                                      | L37750   | GRMZM2G081554 | 241218603 | chr1 | 241217103 | 241220102 | chr1:241217103-<br>241220102 | 1  |
| <b>bz2</b>   | bronze2                                          | U14599   | GRMZM2G016241 | 241373004 | chr1 | 241371504 | 241374503 | chr1:241371504-<br>241374503 | -1 |
| <b>cyp8</b>  | cytochrome P-<br>450 8                           | L23209   | GRMZM2G167986 | 243649093 | chr1 | 243647593 | 243650592 | chr1:243647593-<br>243650592 | 1  |

|              |                              |          |                  |           |      |           |           |                          |    |
|--------------|------------------------------|----------|------------------|-----------|------|-----------|-----------|--------------------------|----|
| <b>cdj2</b>  | chaperone DNA J2             | AF053468 | GRMZM2G364069    | 250095992 | chr1 | 250094492 | 250097491 | chr1:250094492-250097491 | -1 |
| <b>vp14</b>  | viviparous14                 | U95953   | GRMZM2G014392    | 250895242 | chr1 | 250893742 | 250896741 | chr1:250893742-250896741 | -1 |
| <b>rth1</b>  | roothair defective1          | AY265854 | GRMZM2G099056    | 253893686 | chr1 | 253892186 | 253895185 | chr1:253892186-253895185 | 1  |
| <b>kip1</b>  | knotted interacting protein1 | AY082396 | GRMZM2G163761    | 256513586 | chr1 | 256512086 | 256515085 | chr1:256512086-256515085 | 1  |
| <b>glb1</b>  | globulin1                    | U28017   | GRMZM2G067919    | 258363419 | chr1 | 258361919 | 258364918 | chr1:258361919-258364918 | 1  |
| <b>tub3</b>  | beta tubulin3                | X74654   | GRMZM2G108766    | 258555202 | chr1 | 258553702 | 258556701 | chr1:258553702-258556701 | -1 |
| <b>lox3</b>  | lipxygenase3                 | AF465643 | GRMZM2G109130    | 264200949 | chr1 | 264199449 | 264202448 | chr1:264199449-264202448 | 1  |
| <b>tb1</b>   | teosinte branched1           | U94494   | AC233950.1_FG002 | 265745979 | chr1 | 265744479 | 265747478 | chr1:265744479-265747478 | 1  |
| <b>d8</b>    | dwarf plant8                 | AY103865 | GRMZM2G144744    | 266094769 | chr1 | 266093269 | 266096268 | chr1:266093269-266096268 | 1  |
| <b>gln2</b>  | glutamine synthetase2        | X65927   | GRMZM2G024104    | 267897525 | chr1 | 267896025 | 267899024 | chr1:267896025-267899024 | -1 |
| <b>phyA1</b> | phytochromeA1                | AY234826 | GRMZM2G157727    | 269329351 | chr1 | 269327851 | 269330850 | chr1:269327851-269330850 | -1 |
| <b>kn1</b>   | knotted1                     | X61308   | GRMZM2G017087    | 271348525 | chr1 | 271347025 | 271350024 | chr1:271347025-271350024 | -1 |
| <b>knox3</b> | knotted related homeobox3    | DQ056238 | GRMZM2G000743    | 271628373 | chr1 | 271626873 | 271629872 | chr1:271626873-271629872 | -1 |
| <b>emp4</b>  | empty pericarp4              | DQ291135 | GRMZM2G092198    | 272034519 | chr1 | 272033019 | 272036018 | chr1:272033019-272036018 | 1  |
| <b>adh1</b>  | alcohol dehydrogenase1       | M32984   | GRMZM2G442658    | 273986641 | chr1 | 273985141 | 273988140 | chr1:273985141-273988140 | -1 |
| <b>tlk1</b>  | tousled-like protein kinase1 | AY644701 | GRMZM2G016671    | 276362808 | chr1 | 276361308 | 276364307 | chr1:276361308-276364307 | -1 |
| <b>phyC1</b> | phytochromeC1                | AY234829 | GRMZM2G057935    | 276997822 | chr1 | 276996322 | 276999321 | chr1:276996322-276999321 | -1 |
| <b>zmm24</b> | Zea mays MADS24              | AJ430638 | GRMZM2G087095    | 277348765 | chr1 | 277347265 | 277350264 | chr1:277347265-277350264 | -1 |
| <b>lem1</b>  | lethal embryo mutant1        | AF332374 | AC234157.1_FG002 | 281109091 | chr1 | 281107591 | 281110590 | chr1:281107591-281110590 | -1 |
| <b>vp8</b>   | viviparous8                  | EU401893 | GRMZM2G010353    | 286319225 | chr1 | 286317725 | 286320724 | chr1:286317725-286320724 | 1  |
| <b>glb2</b>  | globulin2                    | X53715   | GRMZM2G026703    | 287065014 | chr1 | 287063514 | 287066513 | chr1:287063514-287066513 | -1 |
| <b>gdh1</b>  | glutamic                     | AY106054 | GRMZM2G178415    | 287296815 | chr1 | 287295315 | 287298314 | chr1:287295315-          | -1 |

|             |                                        |          |                  |           |       |           |           |                          |    |
|-------------|----------------------------------------|----------|------------------|-----------|-------|-----------|-----------|--------------------------|----|
|             | dehydrogenase1                         |          |                  |           |       |           |           | 287298314                |    |
| <b>ohp1</b> | opaque2 heterodimerizing protein1      | L00623   | GRMZM2G016150    | 288212296 | chr1  | 288210796 | 288213795 | chr1:288210796-288213795 | -1 |
| <b>ts6</b>  | tasselseed6                            | AF048900 | GRMZM5G862109    | 292889740 | chr1  | 292888240 | 292891239 | chr1:292888240-292891239 | 1  |
| <b>chi1</b> | chalcone flavanone isomerase1          | Z22760   | GRMZM2G155329    | 293042705 | chr1  | 293041205 | 293044204 | chr1:293041205-293044204 | -1 |
| <b>fdx3</b> | ferredoxin3                            | AB001387 | GRMZM2G053458    | 296017136 | chr1  | 296015636 | 296018635 | chr1:296015636-296018635 | 1  |
| <b>rp1</b>  | resistance to Puccinia sorghi1         | AF107293 | AC152495.1 FG002 | 3284464   | chr10 | 3282964   | 3285963   | chr10:3282964-3285963    | -1 |
| <b>plt1</b> | phospholipid transfer protein homolog1 | J04176   | GRMZM2G101958    | 4166593   | chr10 | 4165093   | 4168092   | chr10:4165093-4168092    | -1 |
| <b>cr4</b>  | crinkly4                               | U67422   | GRMZM2G051637    | 5587952   | chr10 | 5586452   | 5589451   | chr10:5586452-5589451    | 1  |
| <b>oy1</b>  | oil yellow1                            | DQ084025 | GRMZM2G419806    | 9225379   | chr10 | 9223879   | 9226878   | chr10:9223879-9226878    | -1 |
| <b>abp4</b> | auxin binding protein homolog4         | L08426   | GRMZM2G064371    | 26665955  | chr10 | 26664455  | 26667454  | chr10:26664455-26667454  | -1 |
| <b>glu1</b> | beta glucosidase1                      | U33816   | GRMZM2G016890    | 34232717  | chr10 | 34231217  | 34234216  | chr10:34231217-34234216  | 1  |
| <b>cip1</b> | cytokinin inducible protease1          | T14785   | GRMZM2G009443    | 35583589  | chr10 | 35582089  | 35585088  | chr10:35582089-35585088  | 1  |
| <b>glu2</b> | beta-glucosidase2                      | U44087   | GRMZM2G008247    | 37754967  | chr10 | 37753467  | 37756466  | chr10:37753467-37756466  | 1  |
| <b>du1</b>  | dull endosperm1                        | AF023159 | GRMZM2G141399    | 59506710  | chr10 | 59505210  | 59508209  | chr10:59505210-59508209  | 1  |
| <b>rel2</b> | ramosa1 enhancer locus2                |          | GRMZM2G042992    | 76645749  | chr10 | 76644249  | 76647248  | chr10:76644249-76647248  | -1 |
| <b>ane3</b> | androgenic embryo3                     | AJ307880 | GRMZM2G372553    | 80739035  | chr10 | 80737535  | 80740534  | chr10:80737535-80740534  | 1  |
| <b>fie2</b> | fertilization independent endosperm2   | AY061965 | GRMZM2G148924    | 84097287  | chr10 | 84095787  | 84098786  | chr10:84095787-84098786  | -1 |
| <b>orp2</b> | orange pericarp2                       | M76685   | GRMZM2G005024    | 84236564  | chr10 | 84235064  | 84238063  | chr10:84235064-84238063  | -1 |
| <b>nac1</b> | NaCl stress protein1                   | T14760   | GRMZM2G015605    | 87270963  | chr10 | 87269463  | 87272462  | chr10:87269463-87272462  | -1 |
| <b>dcd1</b> | discordia1                             | FJ469780 | GRMZM2G083459    | 90762153  | chr10 | 90760653  | 90763652  | chr10:90760653-90763652  | 1  |



|              |                                      |          |                  |           |       |           |           |                           |    |
|--------------|--------------------------------------|----------|------------------|-----------|-------|-----------|-----------|---------------------------|----|
| <b>mgs1</b>  | male-gametophyte specific1           | S44171   | GRMZM2G317406    | 111843643 | chr10 | 111842143 | 111845142 | chr10:111842143-111845142 | -1 |
| <b>incw3</b> | invertase cell wall3                 | AF043346 | GRMZM2G123633    | 114288173 | chr10 | 114286673 | 114289672 | chr10:114286673-114289672 | 1  |
|              | Polyadenylate-binding protein 2      |          | GRMZM2G013619    | 128868237 | chr10 | 128866737 | 128869736 | chr10:128866737-128869736 | -1 |
| <b>yab14</b> | yabby14                              | AY313901 | GRMZM2G005353    | 133111834 | chr10 | 133110334 | 133113333 | chr10:133110334-133113333 | -1 |
|              | Histone H4                           |          | GRMZM2G149178    | 134806076 | chr10 | 134804576 | 134807575 | chr10:134804576-134807575 | -1 |
| <b>ocl2</b>  | outer cell layer2                    | AJ250984 | AC235534.1 FG007 | 136932960 | chr10 | 136931460 | 136934459 | chr10:136931460-136934459 | 1  |
| <b>hopi1</b> | hopi r1/b1 family member1            | AJ251719 | GRMZM5G822829    | 138462252 | chr10 | 138460752 | 138463751 | chr10:138460752-138463751 | 1  |
| <b>r1</b>    | colored1, seed color component at R1 | X15806   | GRMZM5G822829    | 138462252 | chr10 | 138460752 | 138463751 | chr10:138460752-138463751 | 1  |
| <b>sn1</b>   | scutellar node color1                | X60706   | GRMZM5G822829    | 138462252 | chr10 | 138460752 | 138463751 | chr10:138460752-138463751 | 1  |
| <b>lc1</b>   | red leaf color1                      | M26227   | GRMZM5G822829    | 138462252 | chr10 | 138460752 | 138463751 | chr10:138460752-138463751 | 1  |
| <b>zfl1</b>  | zea floricaula/leafy1                | AY179882 | GRMZM2G098813    | 140851443 | chr10 | 140849943 | 140852942 | chr10:140849943-140852942 | 1  |
| <b>rps11</b> | ribosomal protein S11                | X55967   | GRMZM2G019325    | 142067983 | chr10 | 142066483 | 142069482 | chr10:142066483-142069482 | 1  |
|              | LIGULELESS1                          |          | GRMZM2G058588    | 146295099 | chr10 | 146293599 | 146296598 | chr10:146293599-146296598 | -1 |
| <b>gln1</b>  | glutamine synthetase1                | X65931   | GRMZM2G098290    | 146471079 | chr10 | 146469579 | 146472578 | chr10:146469579-146472578 | -1 |
| <b>vp10</b>  | viviparous10                         | DQ231522 | GRMZM2G067176    | 146668953 | chr10 | 146667453 | 146670452 | chr10:146667453-146670452 | 1  |
| <b>crr2</b>  | cytokinin response regulator2        | AB031012 | GRMZM2G392101    | 147844785 | chr10 | 147843285 | 147846284 | chr10:147843285-147846284 | 1  |
| <b>fht1</b>  | flavanone 3-hydroxylase1             | U04434   | GRMZM2G062396    | 3556786   | chr2  | 3555286   | 3558285   | chr2:3555286-3558285      | 1  |
| <b>lg1</b>   | liguleless1                          | AF451895 | GRMZM2G036297    | 4263201   | chr2  | 4261701   | 4264700   | chr2:4261701-4264700      | -1 |
| <b>gl2</b>   | glossy2                              | X88779   | GRMZM2G098239    | 10627540  | chr2  | 10626040  | 10629039  | chr2:10626040-10629039    | -1 |
|              | WRKY68-superfamily TF                |          | GRMZM2G071907    | 11755126  | chr2  | 11753626  | 11756625  | chr2:11753626-11756625    | -1 |
| <b>zfl2</b>  | Zea floricaula                       | AY179881 | GRMZM2G180190    | 12644804  | chr2  | 12643304  | 12646303  | chr2:12643304-            | -1 |

|               |                                                 |          |                                |                        |              |                        |                        |                                             |         |
|---------------|-------------------------------------------------|----------|--------------------------------|------------------------|--------------|------------------------|------------------------|---------------------------------------------|---------|
|               | leafy2                                          |          |                                |                        |              |                        |                        | 12646303                                    |         |
| <b>b1</b>     | colored plant1                                  | X70791   | GRMZM2G172795                  | 18417370               | chr2         | 18415870               | 18418869               | chr2:18415870-18418869                      | 1       |
| <b>ole1</b>   | oleosin1                                        | U13701   | GRMZM2G337229                  | 20765568               | chr2         | 20764068               | 20767067               | chr2:20764068-20767067                      | 1       |
| <b>ivr1</b>   | invertase1                                      | U16123   | GRMZM2G394450                  | 22885337               | chr2         | 22883837               | 22886836               | chr2:22883837-22886836                      | -1      |
| <b>abph1</b>  | aberrant phyllotaxy1                            | AB042260 | GRMZM2G035688                  | 27483514               | chr2         | 27482014               | 27485013               | chr2:27482014-27485013                      | -1      |
| <b>sam2</b>   | S-adenosyl methionine decarboxylase2            | W99255   | GRMZM2G154397                  | 32495438               | chr2         | 32493938               | 32496937               | chr2:32493938-32496937                      | -1      |
| <b>mop1</b>   | mediator of paramutation1                       | DQ417755 | GRMZM2G042443                  | 40508183               | chr2         | 40506683               | 40509682               | chr2:40506683-40509682                      | -1      |
| <b>prp2</b>   | pathogenesis-related protein2                   | T18697   | GRMZM2G102356                  | 40589174               | chr2         | 40587674               | 40590673               | chr2:40587674-40590673                      | -1      |
| <b>grf1</b>   | general regulatory factor1                      | AY110485 | GRMZM2G102499                  | 41306124               | chr2         | 41304624               | 41307623               | chr2:41304624-41307623                      | -1      |
| <b>gpa1</b>   | glyceraldehyde-3-phosphate dehydrogenase1       | X07157   | GRMZM2G337113                  | 42259297               | chr2         | 42257797               | 42260796               | chr2:42257797-42260796                      | -1      |
| <b>ts1</b>    | tassel seed1                                    | FJ360855 | GRMZM2G104843                  | 45196460               | chr2         | 45194960               | 45197959               | chr2:45194960-45197959                      | -1      |
| <b>hrp1</b>   | hydroxyproline rich glycoprotein1               | X63134   | GRMZM2G168651                  | 54764823               | chr2         | 54763323               | 54766322               | chr2:54763323-54766322                      | -1      |
| <b>mn1</b>    | miniature seed1                                 | AF050631 | GRMZM2G119689                  | 56806976               | chr2         | 56805476               | 56808475               | chr2:56805476-56808475                      | 1       |
| <b>sbe3</b>   | starch branching enzyme3                        | U65948   | GRMZM2G073054                  | 58586007               | chr2         | 58584507               | 58587506               | chr2:58584507-58587506                      | 1       |
| <b>hcf106</b> | high chlorophyll fluorescence106                | AF027808 | GRMZM5G898735                  | 65182701               | chr2         | 65181201               | 65184200               | chr2:65181201-65184200                      | 1       |
| <b>acc1</b>   | acetyl-coenzyme A carboxylase1                  | Z24449   | GRMZM5G858094                  | 82394515               | chr2         | 82393015               | 82396014               | chr2:82393015-82396014                      | 1       |
| <b>ns1</b>    | narrow sheath1                                  | AJ536578 | GRMZM2G069028                  | 142532298              | chr2         | 142530798              | 142533797              | chr2:142530798-142533797                    | 1       |
| <b>ssu2</b>   | ribulose biphosphate carboxylase small subunit2 | Y09214   | GRMZM2G113033                  | 142794871              | chr2         | 142793371              | 142796370              | chr2:142793371-142796370                    | 1       |
| <b>emp2</b>   | 40s ribosomal protein S16<br>empty pericarp 2   | AF494285 | GRMZM2G377797<br>GRMZM2G039155 | 149785316<br>177651736 | chr2<br>chr2 | 149783816<br>177650236 | 149786815<br>177653235 | chr2:149783816-149786815<br>chr2:177650236- | 1<br>-1 |

|               |                                                             |          |                  |           |      |           |           |                          |    |
|---------------|-------------------------------------------------------------|----------|------------------|-----------|------|-----------|-----------|--------------------------|----|
|               |                                                             |          |                  |           |      |           | 177653235 |                          |    |
|               | DNA repair protein RAD23 (Putative uncharacterized protein) |          | GRMZM2G105772    | 179742429 | chr2 | 179740929 | 179743928 | chr2:179740929-179743928 | 1  |
|               | Histone H4                                                  |          | GRMZM2G332838    | 183295915 | chr2 | 183294415 | 183297414 | chr2:183294415-183297414 | 1  |
| <b>amya3</b>  | alpha amylase3                                              | L25805   | GRMZM2G138468    | 186265525 | chr2 | 186264025 | 186267024 | chr2:186264025-186267024 | 1  |
| <b>dof2</b>   | DNA binding with one finger2                                | X79934   | GRMZM2G009406    | 188527888 | chr2 | 188526388 | 188529387 | chr2:188526388-188529387 | -1 |
| <b>zmm7</b>   | Zea mays MADS7                                              | Y09302   | GRMZM2G129034    | 192226954 | chr2 | 192225454 | 192228453 | chr2:192225454-192228453 | 1  |
| <b>tua5</b>   | alpha tubulin5                                              | X63177   | GRMZM2G099167    | 206628370 | chr2 | 206626870 | 206629869 | chr2:206626870-206629869 | 1  |
| <b>EIF5A</b>  | elongation initiation factor5A                              | H35879   | GRMZM2G113696    | 209292956 | chr2 | 209291456 | 209294455 | chr2:209291456-209294455 | -1 |
|               | F-box protein                                               |          | GRMZM2G125004    | 211511920 | chr2 | 211510420 | 211513419 | chr2:211510420-211513419 | 1  |
|               | Gibberellin receptor GID1L2                                 |          | GRMZM2G062019    | 219157215 | chr2 | 219155715 | 219158714 | chr2:219155715-219158714 | -1 |
| <b>whp1</b>   | white pollen1                                               | X60204   | GRMZM2G151227    | 223892691 | chr2 | 223891191 | 223894190 | chr2:223891191-223894190 | -1 |
| <b>rrb1</b>   | related to retinoblastoma1                                  | AF007793 | GRMZM2G003043    | 223982849 | chr2 | 223981349 | 223984348 | chr2:223981349-223984348 | -1 |
| <b>pex1</b>   | pollen extensin-like1                                       | Z34465   | GRMZM5G841015    | 230388858 | chr2 | 230387358 | 230390357 | chr2:230387358-230390357 | -1 |
| <b>gn1</b>    | gnarley1                                                    | AY312168 | GRMZM2G452178    | 236473321 | chr2 | 236471821 | 236474820 | chr2:236471821-236474820 | 1  |
| <b>g2</b>     | golden plant2                                               | AF298118 | GRMZM2G087804    | 1464399   | chr3 | 1462899   | 1465898   | chr3:1462899-1465898     | 1  |
| <b>me3</b>    | NADP malic enzyme3                                          | J05130   | GRMZM2G085019    | 7275169   | chr3 | 7273669   | 7276668   | chr3:7273669-7276668     | 1  |
| <b>hsp18f</b> | heat shock protein18f                                       | X54076   | GRMZM2G083810    | 8885815   | chr3 | 8884315   | 8887314   | chr3:8884315-8887314     | -1 |
| <b>ra2</b>    | ramosa2                                                     | BT035538 | AC233943.1 FG002 | 12882491  | chr3 | 12880991  | 12883990  | chr3:12880991-12883990   | 1  |
| <b>Smh5</b>   | Single Myb Histone5                                         | AY280630 | GRMZM2G163291    | 14473799  | chr3 | 14472299  | 14475298  | chr3:14472299-14475298   | -1 |
|               | 60S ribosomal protein L26-1                                 |          | GRMZM2G327564    | 19670484  | chr3 | 19668984  | 19671983  | chr3:19668984-19671983   | -1 |
| <b>ocl1</b>   | outer cell layer1                                           | Y17898   | GRMZM2G026643    | 27551288  | chr3 | 27549788  | 27552787  | chr3:27549788-27552787   | 1  |

|                |                                              |              |                  |           |      |           |           |                          |    |
|----------------|----------------------------------------------|--------------|------------------|-----------|------|-----------|-----------|--------------------------|----|
| <b>cal2</b>    | calmodulin2                                  | X77397       | GRMZM2G067511    | 38428236  | chr3 | 38426736  | 38429735  | chr3:38426736-38429735   | 1  |
| <b>sun2</b>    | sad1-unc84-like<br>2 CCSD type               | BT055722     | GRMZM2G440614    | 38600151  | chr3 | 38598651  | 38601650  | chr3:38598651-38601650   | 1  |
| <b>lg3</b>     | liguleless3                                  | AF100455     | GRMZM2G087741    | 53881358  | chr3 | 53879858  | 53882857  | chr3:53879858-53882857   | 1  |
| <b>sar1</b>    | SAR homolog1                                 | T14655       | GRMZM2G038356    | 63528278  | chr3 | 63526778  | 63529777  | chr3:63526778-63529777   | 1  |
| <b>spi1</b>    | sparse<br>inflorescence1                     | EU910940     | GRMZM2G025222    | 69966731  | chr3 | 69965231  | 69968230  | chr3:69965231-69968230   | -1 |
| <b>uce1</b>    | ubiquitin<br>conjugating<br>enzyme1          | T18767       | GRMZM2G018447    | 93205169  | chr3 | 93203669  | 93206668  | chr3:93203669-93206668   | -1 |
| <b>hsp70-4</b> | heat shock<br>protein70-4                    | X78414       | GRMZM2G340251    | 126465045 | chr3 | 126463545 | 126466544 | chr3:126463545-126466544 | -1 |
| <b>betl3</b>   | basal endosperm<br>transfer layer3           | AJ133530     | GRMZM2G175976    | 132255638 | chr3 | 132254138 | 132257137 | chr3:132254138-132257137 | 1  |
|                | Histone H3                                   |              | GRMZM2G475899    | 132269513 | chr3 | 132268013 | 132271012 | chr3:132268013-132271012 | -1 |
| <b>abp1</b>    | auxin binding<br>protein1                    | L08425       | GRMZM2G116204    | 133888888 | chr3 | 133887388 | 133890387 | chr3:133887388-133890387 | 1  |
| <b>zag2</b>    | Zea AGAMOUS<br>homolog2                      | L18925       | GRMZM2G160687    | 137233198 | chr3 | 137231698 | 137234697 | chr3:137231698-137234697 | -1 |
| <b>ts4</b>     | tassel seed4                                 | GQ90558<br>8 | GRMZM5G803935    | 144884032 | chr3 | 144882532 | 144885531 | chr3:144882532-144885531 | 1  |
| <b>pgd2</b>    | 6-<br>phosphogluconat<br>e<br>dehydrogenase2 | AF061837     | GRMZM2G145715    | 153929056 | chr3 | 153927556 | 153930555 | chr3:153927556-153930555 | -1 |
| <b>gst4</b>    | glutathione S-<br>transferase4               | W49853       | GRMZM2G146246    | 154975444 | chr3 | 154973944 | 154976943 | chr3:154973944-154976943 | -1 |
| <b>myb2</b>    | myb2                                         | AF458962     | AC203535.4_FG001 | 157508995 | chr3 | 157507495 | 157510494 | chr3:157507495-157510494 | 1  |
| <b>vp1</b>     | viviparous1                                  | M60214       | GRMZM2G133398    | 162799871 | chr3 | 162798371 | 162801370 | chr3:162798371-162801370 | 1  |
| <b>te1</b>     | terminal ear1                                | AF047852     | GRMZM2G085113    | 165178071 | chr3 | 165176571 | 165179570 | chr3:165176571-165179570 | -1 |
| <b>ald1</b>    | aldolase1                                    | X12872       | GRMZM2G057823    | 165722970 | chr3 | 165721470 | 165724469 | chr3:165721470-165724469 | 1  |
| <b>im30p1</b>  | IM30 protein<br>homolog1                     | T12745       | GRMZM2G017077    | 168373431 | chr3 | 168371931 | 168374930 | chr3:168371931-168374930 | -1 |
| <b>lox1</b>    | lipoyxygenase1                               | DQ335760     | GRMZM2G156861    | 168835321 | chr3 | 168833821 | 168836820 | chr3:168833821-168836820 | 1  |
| <b>ig1</b>     | indeterminate                                | EF081454     | GRMZM2G118250    | 169220962 | chr3 | 169219462 | 169222461 | chr3:169219462-          | -1 |

|              |                                                              |          |               |           |      |           |           |                          |    |
|--------------|--------------------------------------------------------------|----------|---------------|-----------|------|-----------|-----------|--------------------------|----|
|              | gametophyte1                                                 |          |               |           |      |           |           | 169222461                |    |
|              | Histone H3                                                   |          | GRMZM2G078314 | 175869457 | chr3 | 175867957 | 175870956 | chr3:175867957-175870956 | -1 |
| <b>lg2</b>   | liguleless2                                                  | AY180106 | GRMZM2G060216 | 176800215 | chr3 | 176798715 | 176801714 | chr3:176798715-176801714 | 1  |
| <b>taf1</b>  | transcription associated factor1                             | T12672   | GRMZM2G002276 | 179784326 | chr3 | 179782826 | 179785825 | chr3:179782826-179785825 | 1  |
|              | 40S ribosomal protein S23 (Putative uncharacterized protein) |          | GRMZM2G084465 | 182279648 | chr3 | 182278148 | 182281147 | chr3:182278148-182281147 | 1  |
| <b>ba1</b>   | barren stalk1                                                | AY753892 | GRMZM2G397518 | 183084299 | chr3 | 183082799 | 183085798 | chr3:183082799-183085798 | 1  |
| <b>expa1</b> | alpha expansin1                                              | AY104146 | GRMZM2G339122 | 184365593 | chr3 | 184364093 | 184367092 | chr3:184364093-184367092 | -1 |
| <b>rnc1</b>  | ribonuclease III domain protein1                             | EU971053 | GRMZM2G035820 | 187172511 | chr3 | 187171011 | 187174010 | chr3:187171011-187174010 | 1  |
| <b>tub6</b>  | beta tubulin6                                                | L10633   | GRMZM2G071790 | 187444892 | chr3 | 187443392 | 187446391 | chr3:187443392-187446391 | -1 |
| <b>psei1</b> | cystatin1                                                    | AM055630 | GRMZM2G438551 | 187720118 | chr3 | 187718618 | 187721617 | chr3:187718618-187721617 | -1 |
| <b>pk4</b>   | protein kinase4                                              | AF141378 | GRMZM2G014833 | 195508248 | chr3 | 195506748 | 195509747 | chr3:195506748-195509747 | 1  |
| <b>Smh4</b>  | Single Myb Histone4                                          | AY280631 | GRMZM2G108424 | 204366143 | chr3 | 204364643 | 204367642 | chr3:204364643-204367642 | -1 |
| <b>a1</b>    | anthocyaninless1                                             | X05068   | GRMZM2G026930 | 216306568 | chr3 | 216305068 | 216308067 | chr3:216305068-216308067 | -1 |
| <b>sh2</b>   | shrunken2                                                    | M81603   | GRMZM2G429899 | 216424048 | chr3 | 216422548 | 216425547 | chr3:216422548-216425547 | -1 |
|              | Ribosomal protein L19                                        |          | GRMZM2G116135 | 220506759 | chr3 | 220505259 | 220508258 | chr3:220505259-220508258 | 1  |
| <b>Smh2</b>  | Single Myb Histone2                                          |          | GRMZM2G087817 | 221578994 | chr3 | 221577494 | 221580493 | chr3:221577494-221580493 | 1  |
| <b>et1</b>   | etched1                                                      | AJ507104 | GRMZM2G157574 | 223740961 | chr3 | 223739461 | 223742460 | chr3:223739461-223742460 | -1 |
| <b>phot1</b> | blue-light receptor phototropin 1                            | AF033263 | GRMZM2G001457 | 229132796 | chr3 | 229131296 | 229134295 | chr3:229131296-229134295 | 1  |
|              | 40s ribosomal protein S16                                    |          | GRMZM2G353103 | 230441023 | chr3 | 230439523 | 230442522 | chr3:230439523-230442522 | 1  |
|              | Nucleic acid binding protein                                 |          | GRMZM2G044004 | 230523607 | chr3 | 230522107 | 230525106 | chr3:230522107-230525106 | 1  |

|              |                                           |          |                  |           |      |           |           |                          |    |
|--------------|-------------------------------------------|----------|------------------|-----------|------|-----------|-----------|--------------------------|----|
| <b>plt2</b>  | phospholipid transfer protein homolog2    | U66105   | GRMZM2G010868    | 230608235 | chr3 | 230606735 | 230609734 | chr3:230606735-230609734 | -1 |
| <b>cyp1</b>  | cytochrome P450 homolog1                  | T12664   | GRMZM5G899349    | 232072064 | chr3 | 232070564 | 232073563 | chr3:232070564-232073563 | 1  |
| <b>bx5</b>   | benzoxazinone synthesis5                  | X81830   | GRMZM2G063756    | 3108397   | chr4 | 3106897   | 3109896   | chr4:3106897-3109896     | 1  |
| <b>bx1</b>   | benzoxazinless1                           | X76713   | GRMZM2G085381    | 3256291   | chr4 | 3254791   | 3257790   | chr4:3254791-3257790     | 1  |
| <b>zpl2b</b> | zein polypeptidesL2b                      | AF371270 | GRMZM2G404459    | 5516523   | chr4 | 5515023   | 5518022   | chr4:5515023-5518022     | 1  |
| <b>rtp1</b>  | Zea root preferential4                    | L14063   | GRMZM2G017557    | 11917798  | chr4 | 11916298  | 11919297  | chr4:11916298-11919297   | -1 |
| <b>adh2</b>  | alcohol dehydrogenase2                    | X02915   | GRMZM2G098346    | 13398777  | chr4 | 13397277  | 13400276  | chr4:13397277-13400276   | -1 |
| <b>pdi1</b>  | protein disulfide isomerase1              | AY739284 | GRMZM2G091481    | 14859167  | chr4 | 14857667  | 14860666  | chr4:14857667-14860666   | -1 |
| <b>fl2</b>   | floury2                                   | L34340   | GRMZM2G397687    | 21313379  | chr4 | 21311879  | 21314878  | chr4:21311879-21314878   | -1 |
| <b>ocl5a</b> | outer cell layer5a                        | AJ250987 | GRMZM2G130442    | 28986080  | chr4 | 28984580  | 28987579  | chr4:28984580-28987579   | -1 |
| <b>zp1</b>   | zein alpha protein1                       | X58700   | GRMZM2G008913    | 29933783  | chr4 | 29932283  | 29935282  | chr4:29932283-29935282   | 1  |
| <b>bm3</b>   | brown midrib3                             | M73235   | AC196475.3_FG004 | 32251536  | chr4 | 32250036  | 32253035  | chr4:32250036-32253035   | -1 |
| <b>bap2</b>  | basal layer antifungal protein2           | AJ133529 | GRMZM2G152655    | 34264143  | chr4 | 34262643  | 34265642  | chr4:34262643-34265642   | 1  |
| <b>fie1</b>  | fertilization independent endosperm1      | AY061964 | GRMZM2G118205    | 35763186  | chr4 | 35761686  | 35764685  | chr4:35761686-35764685   | -1 |
| <b>orp1</b>  | orange pericarp1                          | M76684   | GRMZM2G169593    | 35920931  | chr4 | 35919431  | 35922430  | chr4:35919431-35922430   | -1 |
| <b>gpc1</b>  | glyceraldehyde-3-phosphate dehydrogenase1 | X15596   | GRMZM2G046804    | 36884475  | chr4 | 36882975  | 36885974  | chr4:36882975-36885974   | -1 |
| <b>su1</b>   | sugary1                                   | U18908   | GRMZM2G138060    | 41369510  | chr4 | 41368010  | 41371009  | chr4:41368010-41371009   | 1  |
| <b>rpl17</b> | ribosomal protein L17                     | AF034948 | GRMZM2G702426    | 44064386  | chr4 | 44062886  | 44065885  | chr4:44062886-44065885   | -1 |
| <b>tga1</b>  | teosinte glume architecture1              | AY883559 | GRMZM2G101511    | 44509046  | chr4 | 44507546  | 44510545  | chr4:44507546-44510545   | 1  |
| <b>nnr1</b>  | nitrate reductase(NADH)                   | M77792   | GRMZM2G568636    | 56308168  | chr4 | 56306668  | 56309667  | chr4:56306668-56309667   | 1  |

|               |                                                    |          |               |           |      |           |           |                          |    |
|---------------|----------------------------------------------------|----------|---------------|-----------|------|-----------|-----------|--------------------------|----|
|               | )1                                                 |          |               |           |      |           |           |                          |    |
| <b>bt2</b>    | brittle endosperm2                                 | AF544167 | GRMZM2G068506 | 58960100  | chr4 | 58958600  | 58961599  | chr4:58958600-58961599   | -1 |
| <b>his2b2</b> | histone2b2                                         | X57313   | GRMZM2G119071 | 63093826  | chr4 | 63092326  | 63095325  | chr4:63092326-63095325   | -1 |
| <b>hda108</b> | histone deacetylase                                | AF440226 | GRMZM2G136067 | 65962687  | chr4 | 65961187  | 65964186  | chr4:65961187-65964186   | -1 |
| <b>hir1</b>   | hypersensitive induced reaction1                   | AF236373 | GRMZM2G117755 | 74457132  | chr4 | 74455632  | 74458631  | chr4:74455632-74458631   | 1  |
| <b>kan3</b>   | kanadi3                                            | EU925399 | GRMZM2G175827 | 80073206  | chr4 | 80071706  | 80074705  | chr4:80071706-80074705   | 1  |
| <b>yy1</b>    | yin-yang1                                          | AF142322 | GRMZM2G140016 | 115429773 | chr4 | 115428273 | 115431272 | chr4:115428273-115431272 | 1  |
| <b>gpc3</b>   | glyceraldehyde-3-phosphate dehydrogenase3          | L13431   | GRMZM2G071630 | 133103720 | chr4 | 133102220 | 133105219 | chr4:133102220-133105219 | 1  |
| <b>fea2</b>   | fasciated ear2                                     | AY055124 | GRMZM2G104925 | 133664998 | chr4 | 133663498 | 133666497 | chr4:133663498-133666497 | -1 |
| <b>zag5</b>   | zea agamous5                                       | L46398   | GRMZM2G003514 | 156083969 | chr4 | 156082469 | 156085468 | chr4:156082469-156085468 | 1  |
| <b>gln5</b>   | glutamine synthetase5                              | X65929   | GRMZM2G036464 | 167084703 | chr4 | 167083203 | 167086202 | chr4:167083203-167086202 | -1 |
| <b>prh1</b>   | ser/thr protein phosphatase1                       | M60215   | GRMZM2G112240 | 170914968 | chr4 | 170913468 | 170916467 | chr4:170913468-170916467 | 1  |
| <b>ppr5</b>   | pentatricopeptide repeat 5                         | EU037901 | GRMZM2G025409 | 181428451 | chr4 | 181426951 | 181429950 | chr4:181426951-181429950 | -1 |
| <b>gol1</b>   | goliath1                                           |          | GRMZM2G080079 | 181963923 | chr4 | 181962423 | 181965422 | chr4:181962423-181965422 | -1 |
| <b>fer1</b>   | ferritin1                                          | X61391   | GRMZM2G325575 | 183591209 | chr4 | 183589709 | 183592708 | chr4:183589709-183592708 | -1 |
|               | RCN1-Corn Centroradialis/TF L1-like protein (ZCN6) |          | GRMZM2G132880 | 188386280 | chr4 | 188384780 | 188387779 | chr4:188384780-188387779 | -1 |
| <b>ssu1</b>   | ribulose bisphosphate carboxylase small subunit1   | X06535   | GRMZM2G098520 | 190053766 | chr4 | 190052266 | 190055265 | chr4:190052266-190055265 | -1 |
| <b>c2</b>     | colorless2                                         | X60205   | GRMZM2G422750 | 192580450 | chr4 | 192578950 | 192581949 | chr4:192578950-192581949 | 1  |
|               | male sterility protein 2                           |          | GRMZM2G120938 | 207533960 | chr4 | 207532460 | 207535459 | chr4:207532460-207535459 | -1 |
| <b>ane1</b>   | androgenic                                         | AJ011559 | GRMZM2G039942 | 222075476 | chr4 | 222073976 | 222076975 | chr4:222073976-          | -1 |

|              |                                           |          |                  |           |      |           |           |                          |    |
|--------------|-------------------------------------------|----------|------------------|-----------|------|-----------|-----------|--------------------------|----|
|              | embryo1                                   |          |                  |           |      |           |           | 222076975                |    |
| <b>ubi2</b>  | ubiquitin2                                | S94466   | GRMZM2G419891    | 236881289 | chr4 | 236879789 | 236882788 | chr4:236879789-236882788 | 1  |
| <b>EIF5</b>  | eucaryotic translation initiation factor5 | X99517   | GRMZM2G165917    | 237524915 | chr4 | 237523415 | 237526414 | chr4:237523415-237526414 | -1 |
| <b>cat3</b>  | catalase3                                 | L05934   | GRMZM2G079348    | 240105137 | chr4 | 240103637 | 240106636 | chr4:240103637-240106636 | 1  |
| <b>ohp2</b>  | opaque2 heterodimerizing protein2         | L06478   | GRMZM2G007063    | 4253373   | chr5 | 4251873   | 4254872   | chr5:4251873-4254872     | 1  |
| <b>tua1</b>  | alpha tubulin1                            | X63176   | AC195340.3 FG001 | 5435612   | chr5 | 5434112   | 5437111   | chr5:5434112-5437111     | -1 |
| <b>zmm31</b> | Zea mays MADS31                           | AJ430640 | GRMZM2G071620    | 6917457   | chr5 | 6915957   | 6918956   | chr5:6915957-6918956     | 1  |
| <b>zap1</b>  | zea apetala homolog1                      | T12733   | GRMZM2G553379    | 6985304   | chr5 | 6983804   | 6986803   | chr5:6983804-6986803     | 1  |
| <b>phyC2</b> | phytochromeC2                             | AY234830 | GRMZM2G129889    | 7126963   | chr5 | 7125463   | 7128462   | chr5:7125463-7128462     | -1 |
| <b>tlk2</b>  | tousled-like protein kinase2              | AF012889 | GRMZM2G172132    | 7223754   | chr5 | 7222254   | 7225253   | chr5:7222254-7225253     | 1  |
| <b>tua4</b>  | alpha tubulin4                            | X73980   | GRMZM2G152466    | 9475018   | chr5 | 9473518   | 9476517   | chr5:9473518-9476517     | -1 |
|              | Tubulin alpha-3 chain                     |          | GRMZM2G152466    | 9475018   | chr5 | 9473518   | 9476517   | chr5:9473518-9476517     | -1 |
| <b>d9</b>    | dwarf plant9                              | DQ903073 | GRMZM2G024973    | 11784448  | chr5 | 11782948  | 11785947  | chr5:11782948-11785947   | -1 |
| <b>ole3</b>  | oleosin3                                  | J05212   | AC206941.2 FG002 | 12291790  | chr5 | 12290290  | 12293289  | chr5:12290290-12293289   | -1 |
| <b>rab15</b> | responsive to abscisic acid15             | X12564   | GRMZM2G165901    | 14073760  | chr5 | 14072260  | 14075259  | chr5:14072260-14075259   | -1 |
| <b>tub4</b>  | beta tubulin4                             | X74655   | GRMZM2G066191    | 14857185  | chr5 | 14855685  | 14858684  | chr5:14855685-14858684   | -1 |
| <b>tbp2</b>  | TATA-binding protein2                     | L13302   | GRMZM2G161418    | 15328604  | chr5 | 15327104  | 15330103  | chr5:15327104-15330103   | -1 |
| <b>am1</b>   | ameiotic1                                 | DQ663482 | GRMZM5G883855    | 16092084  | chr5 | 16090584  | 16093583  | chr5:16090584-16093583   | 1  |
| <b>Smh6</b>  | Single Myb Histone6                       | AY280632 | GRMZM2G095239    | 17104261  | chr5 | 17102761  | 17105760  | chr5:17102761-17105760   | 1  |
| <b>yab9</b>  | yabby9                                    | AY313903 | GRMZM2G074543    | 23572912  | chr5 | 23571412  | 23574411  | chr5:23571412-23574411   | 1  |
| <b>chn3</b>  | chitinase3                                | L16798   | GRMZM2G389582    | 63277951  | chr5 | 63276451  | 63279450  | chr5:63276451-63279450   | 1  |
| <b>sbe1</b>  | starch branching                          | D11081   | GRMZM2G088753    | 63324803  | chr5 | 63323303  | 63326302  | chr5:63323303-           | -1 |



|              |                                                  |          |                  |           |      |           |           |                          |    |
|--------------|--------------------------------------------------|----------|------------------|-----------|------|-----------|-----------|--------------------------|----|
|              | enzyme1                                          |          |                  |           |      |           |           | 63326302                 |    |
| <b>cat1</b>  | catalase1                                        | X60135   | GRMZM2G088212    | 63564993  | chr5 | 63563493  | 63566492  | chr5:63563493-63566492   | 1  |
| <b>hmg1</b>  | high mobility group protein1                     | X66077   | GRMZM5G834758    | 63802605  | chr5 | 63801105  | 63804104  | chr5:63801105-63804104   | -1 |
| <b>a2</b>    | anthocyaninless2                                 | X55314   | GRMZM2G345717    | 66107721  | chr5 | 66106221  | 66109220  | chr5:66106221-66109220   | 1  |
| <b>ivr2</b>  | invertase2                                       | AJ563384 | GRMZM2G089836    | 67508592  | chr5 | 67507092  | 67510091  | chr5:67507092-67510091   | 1  |
| <b>bip1</b>  | Binding protein homolog1                         | U58208   | GRMZM2G114793    | 69329214  | chr5 | 69327714  | 69330713  | chr5:69327714-69330713   | -1 |
| <b>cf1</b>   | camouflage1                                      | BT042702 | GRMZM2G026117    | 84248220  | chr5 | 84246720  | 84249719  | chr5:84246720-84249719   | 1  |
| <b>sun1</b>  | sad1-unc84-like 1 CCSD type                      | EU964563 | GRMZM2G109818    | 88664543  | chr5 | 88663043  | 88666042  | chr5:88663043-88666042   | -1 |
| <b>bm1</b>   | brown midrib1                                    | AJ005702 | GRMZM5G844562    | 98997371  | chr5 | 98995871  | 98998870  | chr5:98995871-98998870   | -1 |
| <b>ps1</b>   | pink scutellum1                                  | AY206862 | GRMZM5G849107    | 100702026 | chr5 | 100700526 | 100703525 | chr5:100700526-100703525 | -1 |
| <b>bt1</b>   | brittle endosperm1                               | M79333   | GRMZM2G144081    | 112930204 | chr5 | 112928704 | 112931703 | chr5:112928704-112931703 | -1 |
| <b>sxd1</b>  | sucrose export defective1                        | AF302187 | GRMZM2G009785    | 133501928 | chr5 | 133500428 | 133503427 | chr5:133500428-133503427 | 1  |
|              | Peptidyl-prolyl cis-trans isomerase (EC 5.2.1.8) |          | GRMZM2G326111    | 167751373 | chr5 | 167749873 | 167752872 | chr5:167749873-167752872 | 1  |
| <b>incw1</b> | cell wall invertase1                             | U17695   | GRMZM2G139300    | 169454598 | chr5 | 169453098 | 169456097 | chr5:169453098-169456097 | 1  |
| <b>vp15</b>  | viviparous15                                     | DQ273133 | GRMZM2G121468    | 174221421 | chr5 | 174219921 | 174222920 | chr5:174219921-174222920 | -1 |
| <b>gl8</b>   | glossy8                                          | U89509   | AC205703.4_FG006 | 181200367 | chr5 | 181198867 | 181201866 | chr5:181198867-181201866 | -1 |
| <b>pal1</b>  | phenylalanine ammonia lyase homolog1             | M95077   | GRMZM2G074604    | 186680745 | chr5 | 186679245 | 186682244 | chr5:186679245-186682244 | -1 |
| <b>yab15</b> | yabby15                                          | AY313902 | GRMZM2G529859    | 189198008 | chr5 | 189196508 | 189199507 | chr5:189196508-189199507 | 1  |
| <b>ys1</b>   | yellow stripe1                                   | AF186234 | GRMZM2G156599    | 190677896 | chr5 | 190676396 | 190679395 | chr5:190676396-190679395 | -1 |
| <b>bde1</b>  | bearded-ear1                                     | L46397   | GRMZM2G160565    | 196549478 | chr5 | 196547978 | 196550977 | chr5:196547978-196550977 | 1  |
| <b>pac1</b>  | pale aleurone color1                             | AY115485 | GRMZM2G058292    | 196614456 | chr5 | 196612956 | 196615955 | chr5:196612956-196615955 | -1 |

|              |                                           |          |               |           |      |           |           |                          |    |
|--------------|-------------------------------------------|----------|---------------|-----------|------|-----------|-----------|--------------------------|----|
| <b>lec1</b>  | leafy cotyledon                           | AF410176 | GRMZM2G011789 | 204333737 | chr5 | 204332237 | 204335236 | chr5:204332237-204335236 | -1 |
|              | Endoglucanase 1                           |          | GRMZM2G076049 | 205040886 | chr5 | 205039386 | 205042385 | chr5:205039386-205042385 | 1  |
| <b>gln4</b>  | glutamine synthetase4                     | X65928   | GRMZM5G872068 | 205240533 | chr5 | 205239033 | 205242032 | chr5:205239033-205242032 | -1 |
| <b>got2</b>  | glutamate-oxaloacetate transaminase2      | AY105250 | GRMZM5G836910 | 213904655 | chr5 | 213903155 | 213906154 | chr5:213903155-213906154 | 1  |
| <b>pcna1</b> | proliferating cell nuclear antigen1       | X79065   | GRMZM2G030523 | 214424827 | chr5 | 214423327 | 214426326 | chr5:214423327-214426326 | 1  |
| <b>brk1</b>  | brick1                                    | AY093614 | GRMZM5G842058 | 216695321 | chr5 | 216693821 | 216696820 | chr5:216693821-216696820 | -1 |
| <b>gpc2</b>  | glyceraldehyde-3-phosphate dehydrogenase2 | U45858   | GRMZM2G180625 | 6903153   | chr6 | 6901653   | 6904652   | chr6:6901653-6904652     | -1 |
| <b>rgd1</b>  | ragged seedling1                          | DQ832257 | GRMZM2G020187 | 17165362  | chr6 | 17163862  | 17166861  | chr6:17163862-17166861   | 1  |
| <b>zp15</b>  | zein protein                              | M12147   | GRMZM2G086294 | 44382348  | chr6 | 44380848  | 44383847  | chr6:44380848-44383847   | -1 |
| <b>why1</b>  | whirly1                                   | EU595664 | GRMZM2G155662 | 71621497  | chr6 | 71619997  | 71622996  | chr6:71619997-71622996   | -1 |
| <b>mez1</b>  | enhancer of zeste1                        | AF443596 | GRMZM2G157820 | 79469316  | chr6 | 79467816  | 79470815  | chr6:79467816-79470815   | -1 |
| <b>prc1</b>  | proteasome C9 1                           | T14766   | GRMZM2G120047 | 80975832  | chr6 | 80974332  | 80977331  | chr6:80974332-80977331   | -1 |
| <b>tacs1</b> | Terminal Acidic SANT 1                    | AY738116 | GRMZM2G111906 | 82497057  | chr6 | 82495557  | 82498556  | chr6:82495557-82498556   | 1  |
| <b>cyc3</b>  | cyclin3                                   | U10076   | GRMZM2G073671 | 82623958  | chr6 | 82622458  | 82625457  | chr6:82622458-82625457   | -1 |
| <b>si1</b>   | silky1                                    | AF181479 | GRMZM2G139073 | 84785892  | chr6 | 84784392  | 84787391  | chr6:84784392-84787391   | 1  |
|              | Ubiquitin carrier protein (EC 6.3.2.-)    |          | GRMZM2G102421 | 87284723  | chr6 | 87283223  | 87286222  | chr6:87283223-87286222   | -1 |
| <b>pgl2</b>  | polygalacturonase2                        | X57628   | GRMZM2G320175 | 99420663  | chr6 | 99419163  | 99422162  | chr6:99419163-99422162   | -1 |
|              | Elongation factor 1-alpha                 |          | GRMZM2G343543 | 102762866 | chr6 | 102761366 | 102764365 | chr6:102761366-102764365 | -1 |
| <b>dgat1</b> | diacylglycerol acyltransferase1           | EU039830 | GRMZM2G169089 | 104866019 | chr6 | 104864519 | 104867518 | chr6:104864519-104867518 | -1 |
| <b>pl1</b>   | purple plant1                             | AF015268 | GRMZM2G701063 | 108318734 | chr6 | 108317234 | 108320233 | chr6:108317234-108320233 | 1  |
| <b>su2</b>   | sugary2                                   | AY499410 | GRMZM2G348551 | 113233723 | chr6 | 113232223 | 113235222 | chr6:113232223-          | 1  |

|               |                                                                          |          |                  |           |      |           |           |                          |    |
|---------------|--------------------------------------------------------------------------|----------|------------------|-----------|------|-----------|-----------|--------------------------|----|
|               |                                                                          |          |                  |           |      |           |           | 113235222                |    |
|               | Anthocyanidin 3-O-glucosyltransferase                                    |          | GRMZM2G383404    | 120018887 | chr6 | 120017387 | 120020386 | chr6:120017387-120020386 | 1  |
| <b>dzs18</b>  | delta zein structural18                                                  | U31541   | GRMZM2G100018    | 121390345 | chr6 | 121388845 | 121391844 | chr6:121388845-121391844 | 1  |
|               | Ribulose-1,5-bisphosphate carboxylase/oxygenase large subunit (Fragment) |          | GRMZM2G122563    | 123912807 | chr6 | 123911307 | 123914306 | chr6:123911307-123914306 | 1  |
| <b>zag1</b>   | Zea AGAMOUS homolog1                                                     | L18924   | GRMZM2G052890    | 131832722 | chr6 | 131831222 | 131834221 | chr6:131831222-131834221 | -1 |
| <b>sod3</b>   | superoxide dismutase3                                                    | M33119   | GRMZM2G059991    | 135883373 | chr6 | 135881873 | 135884872 | chr6:135881873-135884872 | 1  |
|               | Elongation factor 1-alpha                                                |          | GRMZM2G154218    | 136519080 | chr6 | 136517580 | 136520579 | chr6:136517580-136520579 | -1 |
|               | Elongation factor 1-alpha                                                |          | GRMZM2G149768    | 136572271 | chr6 | 136570771 | 136573770 | chr6:136570771-136573770 | -1 |
|               | Elongation factor 1-alpha                                                |          | GRMZM2G001327    | 136695861 | chr6 | 136694361 | 136697360 | chr6:136694361-136697360 | -1 |
| <b>dhn1</b>   | dehydrin1                                                                | X15290   | GRMZM2G079440    | 137144384 | chr6 | 137142884 | 137145883 | chr6:137142884-137145883 | -1 |
| <b>elfa1</b>  | elongation factor alpha1                                                 | M95072   | AC233866.1_FG006 | 137414138 | chr6 | 137412638 | 137415637 | chr6:137412638-137415637 | -1 |
| <b>tan1</b>   | tangled1                                                                 | AF305892 | GRMZM2G039113    | 142569476 | chr6 | 142567976 | 142570975 | chr6:142567976-142570975 | -1 |
| <b>rnr1</b>   | required to maintain repression1                                         | EU155001 | GRMZM2G154946    | 144279933 | chr6 | 144278433 | 144281432 | chr6:144278433-144281432 | 1  |
| <b>cal1</b>   | calmodulin1                                                              | X74490   | GRMZM2G117582    | 155518148 | chr6 | 155516648 | 155519647 | chr6:155516648-155519647 | -1 |
| <b>prf1</b>   | profilin homolog1                                                        | X73279   | GRMZM2G074361    | 160161670 | chr6 | 160160170 | 160163169 | chr6:160160170-160163169 | 1  |
| <b>hsp101</b> | heat-shock protein 101                                                   | AF077337 | GRMZM2G360681    | 160621048 | chr6 | 160619548 | 160622547 | chr6:160619548-160622547 | 1  |
|               | Histone deacetylase 2b                                                   |          | GRMZM2G159032    | 161234113 | chr6 | 161232613 | 161235612 | chr6:161232613-161235612 | -1 |
| <b>mlg3</b>   | lea protein group3                                                       | U05226   | GRMZM2G096475    | 161966268 | chr6 | 161964768 | 161967767 | chr6:161964768-161967767 | 1  |
| <b>mdh2</b>   | malate dehydrogenase2                                                    | AY103861 | GRMZM2G154595    | 165635858 | chr6 | 165634358 | 165637357 | chr6:165634358-165637357 | -1 |

|               |                                             |          |               |           |      |           |           |                          |    |
|---------------|---------------------------------------------|----------|---------------|-----------|------|-----------|-----------|--------------------------|----|
| <b>tsh1</b>   | tasselsheath1                               |          | GRMZM2G325850 | 166078403 | chr6 | 166076903 | 166079902 | chr6:166076903-166079902 | -1 |
| <b>afd1</b>   | absence of first division1                  | AY788900 | GRMZM2G059037 | 166595022 | chr6 | 166593522 | 166596521 | chr6:166593522-166596521 | 1  |
| <b>tdy1</b>   | tie-dyed1                                   | FJ376984 | GRMZM2G321778 | 166635924 | chr6 | 166634424 | 166637423 | chr6:166634424-166637423 | 1  |
| <b>rs1</b>    | rough sheath1                               | L44133   | GRMZM2G028041 | 3664698   | chr7 | 3663198   | 3666197   | chr7:3663198-3666197     | 1  |
| <b>o2</b>     | opaque endosperm2                           | M29411   | GRMZM2G015534 | 10793452  | chr7 | 10791952  | 10794951  | chr7:10791952-10794951   | 1  |
| <b>dmt101</b> | DNA methyl transferase1                     | AF229183 | GRMZM2G333916 | 11134326  | chr7 | 11132826  | 11135825  | chr7:11132826-11135825   | -1 |
| <b>meg1</b>   | maternally expressed gene1                  | AY536120 | GRMZM2G354335 | 13065608  | chr7 | 13064108  | 13067107  | chr7:13064108-13067107   | 1  |
| <b>sgo1</b>   | shugoshin centromeric cohesion1             | AY964185 | GRMZM2G074082 | 18524500  | chr7 | 18523000  | 18525999  | chr7:18523000-18525999   | -1 |
| <b>in1</b>    | intensifier1                                | U57899   | GRMZM2G042733 | 19349156  | chr7 | 19347656  | 19350655  | chr7:19347656-19350655   | 1  |
| <b>crt2</b>   | calreticulin2                               | X89813   | GRMZM2G358059 | 24413947  | chr7 | 24412447  | 24415446  | chr7:24412447-24415446   | -1 |
| <b>nbp1</b>   | nucleic acid binding protein1               | M74566   | GRMZM2G011129 | 46478537  | chr7 | 46477037  | 46480036  | chr7:46477037-46480036   | 1  |
|               | Cyclin delta-3                              |          | GRMZM2G107377 | 49732339  | chr7 | 49730839  | 49733838  | chr7:49730839-49733838   | 1  |
| <b>pep4</b>   | phosphoenolpyruvate carboxylase4            | X61489   | GRMZM2G473001 | 86439128  | chr7 | 86437628  | 86440627  | chr7:86437628-86440627   | -1 |
| <b>mwp1</b>   | milkweed pod1                               | EU925398 | GRMZM2G082264 | 107239626 | chr7 | 107238126 | 107241125 | chr7:107238126-107241125 | -1 |
| <b>ra1</b>    | ramosa1                                     | AY957396 | GRMZM2G003927 | 110331505 | chr7 | 110330005 | 110333004 | chr7:110330005-110333004 | 1  |
|               | Anthranilate N-benzoyltransferase protein 1 |          | GRMZM2G156296 | 117374335 | chr7 | 117372835 | 117375834 | chr7:117372835-117375834 | -1 |
| <b>gl1</b>    | glossy1                                     | U37428   | GRMZM2G114642 | 118517870 | chr7 | 118516370 | 118519369 | chr7:118516370-118519369 | 1  |
| <b>his2b1</b> | histone2b1                                  | X57312   | GRMZM2G071959 | 119910222 | chr7 | 119908722 | 119911721 | chr7:119908722-119911721 | 1  |
|               | Histone H4                                  |          | GRMZM2G072855 | 119949822 | chr7 | 119948322 | 119951321 | chr7:119948322-119951321 | 1  |
| <b>g zr1</b>  | gamma zein modifier1                        | S78780   | GRMZM2G138727 | 120200894 | chr7 | 120199394 | 120202393 | chr7:120199394-120202393 | 1  |
| <b>z p27</b>  | 27-kDa zein                                 | M16218   | GRMZM2G138727 | 120200894 | chr7 | 120199394 | 120202393 | chr7:120199394-          | 1  |

|              |                                             |          |               |           |      |           |           |                          |    |
|--------------|---------------------------------------------|----------|---------------|-----------|------|-----------|-----------|--------------------------|----|
|              | protein                                     |          |               |           |      |           |           | 120202393                |    |
| <b>ij1</b>   | iojap striping1                             | Z15063   | GRMZM2G004583 | 134096942 | chr7 | 134095442 | 134098441 | chr7:134095442-134098441 | -1 |
| <b>ocl3</b>  | outer cell layer3                           | AJ250985 | GRMZM2G116658 | 141676033 | chr7 | 141674533 | 141677532 | chr7:141674533-141677532 | 1  |
| <b>ugp1</b>  | UDP-glucose pyrophosphorylase1              | T14797   | GRMZM2G032003 | 146498155 | chr7 | 146496655 | 146499654 | chr7:146496655-146499654 | -1 |
| <b>adf1</b>  | actin depolymerizing factor1                | X80820   | GRMZM2G117603 | 148879558 | chr7 | 148878058 | 148881057 | chr7:148878058-148881057 | 1  |
| <b>tif1</b>  | translation initiation factor1              | AF034944 | GRMZM5G835323 | 154269437 | chr7 | 154267937 | 154270936 | chr7:154267937-154270936 | -1 |
| <b>crp1</b>  | chloroplast RNA processing1                 | AF073522 | GRMZM2G083950 | 155837398 | chr7 | 155835898 | 155838897 | chr7:155835898-155838897 | -1 |
| <b>tua6</b>  | alpha tubulin6                              | X63178   | GRMZM2G083243 | 160032302 | chr7 | 160030802 | 160033801 | chr7:160030802-160033801 | 1  |
| <b>tif5A</b> | eukaryotic translation initiation factor 5A | AF034943 | GRMZM2G144030 | 163005888 | chr7 | 163004388 | 163007387 | chr7:163004388-163007387 | -1 |
| <b>ea1</b>   | egg apparatus1                              | AY733074 | GRMZM2G456746 | 164464190 | chr7 | 164462690 | 164465689 | chr7:164462690-164465689 | -1 |
| <b>rpot1</b> | RNA polymerase T phage-like 1               | AF127021 | GRMZM2G381395 | 166121213 | chr7 | 166119713 | 166122712 | chr7:166119713-166122712 | 1  |
| <b>ra3</b>   | ramosa3                                     | DQ436920 | GRMZM2G014729 | 166860909 | chr7 | 166859409 | 166862408 | chr7:166859409-166862408 | -1 |
| <b>fgs1</b>  | ferredoxin-dependent glutamate synthase1    | M59190   | GRMZM2G036609 | 170979959 | chr7 | 170978459 | 170981458 | chr7:170978459-170981458 | -1 |
| <b>sod2</b>  | superoxide dismutase2                       | M54936   | GRMZM2G025992 | 171737098 | chr7 | 171735598 | 171738597 | chr7:171735598-171738597 | -1 |
| <b>bd1</b>   | branched silkless1                          | AY196003 | GRMZM2G307119 | 172209213 | chr7 | 172207713 | 172210712 | chr7:172207713-172210712 | -1 |
|              | 60S ribosomal protein L22-2                 |          | GRMZM2G063617 | 172711231 | chr7 | 172709731 | 172712730 | chr7:172709731-172712730 | 1  |
| <b>wip1</b>  | wound induced protein1                      | X71396   | GRMZM2G156632 | 12274222  | chr8 | 12272722  | 12275721  | chr8:12272722-12275721   | -1 |
| <b>crs2</b>  | chloroplast RNA splicing2                   | AF225708 | GRMZM2G132021 | 12555258  | chr8 | 12553758  | 12556757  | chr8:12553758-12556757   | 1  |
| <b>tpi4</b>  | triose phosphate isomerase4                 | L00371   | GRMZM2G018177 | 14393506  | chr8 | 14392006  | 14395005  | chr8:14392006-14395005   | -1 |
| <b>pd2</b>   | pyruvate                                    | D14456   | GRMZM2G038821 | 15551947  | chr8 | 15550447  | 15553446  | chr8:15550447-           | -1 |

|               |                                                   |          |                  |           |      |           |           |                          |    |
|---------------|---------------------------------------------------|----------|------------------|-----------|------|-----------|-----------|--------------------------|----|
|               | decarboxylase2                                    |          |                  |           |      |           |           | 15553446                 |    |
| <b>hsp18c</b> | heat shock protein18c                             | X54075   | GRMZM2G034157    | 21615163  | chr8 | 21613663  | 21616662  | chr8:21613663-21616662   | 1  |
| <b>zmm2</b>   | Zea mays MADS2                                    | X81200   | GRMZM2G359952    | 22987122  | chr8 | 22985622  | 22988621  | chr8:22985622-22988621   | -1 |
|               | Peroxidase 68                                     |          | GRMZM2G382379    | 23636544  | chr8 | 23635044  | 23638043  | chr8:23635044-23638043   | 1  |
| <b>prp1</b>   | pathogenesis-related protein1                     | X54325   | AC205274.3_FG001 | 52299758  | chr8 | 52298258  | 52301257  | chr8:52298258-52301257   | -1 |
| <b>lhcb3</b>  | light harvesting chlorophyll a/b binding protein3 | X55892   | GRMZM2G155216    | 70798667  | chr8 | 70797167  | 70800166  | chr8:70797167-70800166   | -1 |
| <b>wtf1</b>   | what's this factor?1                              | FJ264201 | GRMZM2G403797    | 72298289  | chr8 | 72296789  | 72299788  | chr8:72296789-72299788   | 1  |
| <b>stp1</b>   | sugar transport1                                  | T12737   | GRMZM2G097768    | 73906483  | chr8 | 73904983  | 73907982  | chr8:73904983-73907982   | -1 |
| <b>act1</b>   | actin1                                            | J01238   | GRMZM2G126010    | 100398658 | chr8 | 100397158 | 100400157 | chr8:100397158-100400157 | -1 |
| <b>tub2</b>   | beta tubulin2                                     | X52879   | GRMZM2G334899    | 104774039 | chr8 | 104772539 | 104775538 | chr8:104772539-104775538 | -1 |
| <b>rip2</b>   | ribosome-inactivating protein2                    |          | GRMZM2G063536    | 109164387 | chr8 | 109162887 | 109165886 | chr8:109162887-109165886 | -1 |
| <b>rip1</b>   | ribosome-inactivating protein1                    |          | GRMZM2G141277    | 109219673 | chr8 | 109218173 | 109221172 | chr8:109218173-109221172 | -1 |
| <b>spp1</b>   | sucrose-phosphatase1                              | AF283564 | GRMZM2G055489    | 116311147 | chr8 | 116309647 | 116312646 | chr8:116309647-116312646 | -1 |
|               | Histone H4                                        |          | GRMZM2G063896    | 117822622 | chr8 | 117821122 | 117824121 | chr8:117821122-117824121 | 1  |
| <b>cyc1</b>   | cyclin1                                           | U10078   | GRMZM2G034647    | 120063628 | chr8 | 120062128 | 120065127 | chr8:120062128-120065127 | -1 |
| <b>mrp1</b>   | Myb related protein1                              | AJ318518 | GRMZM2G111306    | 128429193 | chr8 | 128427693 | 128430692 | chr8:128427693-128430692 | -1 |
| <b>lg4</b>    | liguleless4                                       | AF457118 | GRMZM2G094241    | 130850435 | chr8 | 130848935 | 130851934 | chr8:130848935-130851934 | 1  |
| <b>lyce1</b>  | lycopene epsilon cyclase1                         | EU924262 | GRMZM2G012966    | 138886838 | chr8 | 138885338 | 138888337 | chr8:138885338-138888337 | 1  |
| <b>Smh1</b>   | Single Myb Histone1                               | AY271659 | GRMZM2G136887    | 140378673 | chr8 | 140377173 | 140380172 | chr8:140377173-140380172 | 1  |
| <b>sun5</b>   | sad1-unc84-like 5 PM3 type                        | EU953247 | AC194341.4_FG003 | 141389953 | chr8 | 141388453 | 141391452 | chr8:141388453-141391452 | 1  |
| <b>lhcb1</b>  | light harvesting chlorophyll a/b                  | M87020   | GRMZM2G351977    | 141641842 | chr8 | 141640342 | 141643341 | chr8:141640342-141643341 | 1  |

|              |                                 |          |               |           |      |           |           |                          |    |
|--------------|---------------------------------|----------|---------------|-----------|------|-----------|-----------|--------------------------|----|
|              | binding protein1                |          |               |           |      |           |           |                          |    |
| <b>a4</b>    | anthocyaninless4                | Y16040   | GRMZM2G013726 | 146110828 | chr8 | 146109328 | 146112327 | chr8:146109328-146112327 | 1  |
| <b>Smh3</b>  | Single Myb Histone3             | AY280629 | GRMZM2G023667 | 154154493 | chr8 | 154152993 | 154155992 | chr8:154152993-154155992 | 1  |
| <b>rbap1</b> | WD-repeat protein RBAP1         | AF250047 | GRMZM2G316113 | 154456893 | chr8 | 154455393 | 154458392 | chr8:154455393-154458392 | 1  |
| <b>sps1</b>  | sucrose phosphate synthase1     | M97550   | GRMZM5G875238 | 161916385 | chr8 | 161914885 | 161917884 | chr8:161914885-161917884 | 1  |
|              | Fructose-bisphosphate aldolase  |          | GRMZM2G066024 | 163309969 | chr8 | 163308469 | 163311468 | chr8:163308469-163311468 | -1 |
| <b>sun4</b>  | sad1-unc84-like 4 PM3 type      | GU453173 | GRMZM2G005483 | 165581674 | chr8 | 165580174 | 165583173 | chr8:165580174-165583173 | 1  |
|              | VAMP-like protein YKT62         |          | GRMZM2G387076 | 166504172 | chr8 | 166502672 | 166505671 | chr8:166502672-166505671 | -1 |
| <b>hsp1</b>  | heat shock protein1             | X03697   | GRMZM2G310431 | 168958754 | chr8 | 168957254 | 168960253 | chr8:168957254-168960253 | -1 |
| <b>cyc4b</b> | cyclin4                         | U10079   | GRMZM2G310115 | 171389971 | chr8 | 171388471 | 171391470 | chr8:171388471-171391470 | 1  |
| <b>psei2</b> | cystatin2                       | D63342   | GRMZM2G012160 | 171415029 | chr8 | 171413529 | 171416528 | chr8:171413529-171416528 | -1 |
| <b>gst1</b>  | glutathione-S-transferase1      | X06754   | GRMZM2G116273 | 173117675 | chr8 | 173116175 | 173119174 | chr8:173116175-173119174 | 1  |
| <b>c1</b>    | colored aleurone1               | M37153   | GRMZM2G005066 | 9741876   | chr9 | 9740376   | 9743375   | chr9:9740376-9743375     | -1 |
| <b>sh1</b>   | shrunken1                       | X02400   | GRMZM2G089713 | 11496030  | chr9 | 11494530  | 11497529  | chr9:11494530-11497529   | 1  |
| <b>stc1</b>  | sesquiterpene cyclase1          | AF296122 | GRMZM2G177098 | 11741515  | chr9 | 11740015  | 11743014  | chr9:11740015-11743014   | 1  |
| <b>bz1</b>   | bronze1                         | X13502   | GRMZM2G165390 | 11776491  | chr9 | 11774991  | 11777990  | chr9:11774991-11777990   | -1 |
| <b>stk1</b>  | serine threonine kinase1        | EF523347 | GRMZM2G165433 | 11777535  | chr9 | 11776035  | 11779034  | chr9:11776035-11779034   | 1  |
| <b>zag4</b>  | zea agamous4                    | L46399   | GRMZM2G531231 | 16807234  | chr9 | 16805734  | 16808733  | chr9:16805734-16808733   | -1 |
| <b>ss1</b>   | starch synthase I               | AF036891 | GRMZM2G129451 | 17633649  | chr9 | 17632149  | 17635148  | chr9:17632149-17635148   | 1  |
|              | Histone H3                      |          | GRMZM2G130079 | 17724180  | chr9 | 17722680  | 17725679  | chr9:17722680-17725679   | 1  |
| <b>mrpa3</b> | multidrug resistance-associated | AY609318 | GRMZM2G111903 | 17739642  | chr9 | 17738142  | 17741141  | chr9:17738142-17741141   | 1  |

|               |                                           |          |                  |           |      |           |           |                          |    |
|---------------|-------------------------------------------|----------|------------------|-----------|------|-----------|-----------|--------------------------|----|
|               | protein3                                  |          |                  |           |      |           |           |                          |    |
| <b>eno1</b>   | enolase1                                  | X55981   | GRMZM2G064302    | 22100864  | chr9 | 22099364  | 22102363  | chr9:22099364-22102363   | 1  |
| <b>wx1</b>    | waxy1                                     | AF267643 | GRMZM2G024993    | 23260236  | chr9 | 23258736  | 23261735  | chr9:23258736-23261735   | -1 |
| <b>d3</b>     | dwarf plant3                              | U32579   | GRMZM2G093195    | 26712548  | chr9 | 26711048  | 26714047  | chr9:26711048-26714047   | 1  |
| <b>rf2</b>    | restorer of fertility2                    | U43082   | GRMZM2G058675    | 33125819  | chr9 | 33124319  | 33127318  | chr9:33124319-33127318   | 1  |
| <b>conz1</b>  | constans1                                 | EU098139 | GRMZM2G405368    | 34628528  | chr9 | 34627028  | 34630027  | chr9:34627028-34630027   | 1  |
| <b>pep1</b>   | phosphoenolpyruvate carboxylase1          | X15238   | GRMZM2G083841    | 61296279  | chr9 | 61294779  | 61297778  | chr9:61294779-61297778   | 1  |
| <b>sal1</b>   | supernumerary aleurone1                   | AY243475 | GRMZM2G117935    | 94578265  | chr9 | 94576765  | 94579764  | chr9:94576765-94579764   | -1 |
| <b>gl15</b>   | glossy15                                  | U41466   | GRMZM2G160730    | 95739338  | chr9 | 95737838  | 95740837  | chr9:95737838-95740837   | 1  |
| <b>hm2</b>    | Helminthosporium carbonum susceptibility2 | AF041047 | GRMZM2G086773    | 103234471 | chr9 | 103232971 | 103235970 | chr9:103232971-103235970 | 1  |
| <b>piip1</b>  | physical impedence induced protein1       | AF001634 | AC234161.1_FG001 | 117172962 | chr9 | 117171462 | 117174461 | chr9:117171462-117174461 | 1  |
| <b>sus1</b>   | sucrose synthase1                         | L33244   | GRMZM2G152908    | 122226863 | chr9 | 122225363 | 122228362 | chr9:122225363-122228362 | -1 |
| <b>apt1</b>   | aberrant pollen transmission1             | DQ020097 | GRMZM2G448687    | 128787236 | chr9 | 128785736 | 128788735 | chr9:128785736-128788735 | -1 |
| <b>sod9</b>   | superoxide dismutase9                     | X17564   | GRMZM2G058522    | 129278107 | chr9 | 129276607 | 129279606 | chr9:129276607-129279606 | -1 |
| <b>phyB2</b>  | phytochromeB2                             | AY234828 | GRMZM2G092174    | 134998639 | chr9 | 134997139 | 135000138 | chr9:134997139-135000138 | -1 |
| <b>his2a1</b> | histone2A1                                | U08225   | GRMZM2G305046    | 139187819 | chr9 | 139186319 | 139189318 | chr9:139186319-139189318 | 1  |
| <b>gln3</b>   | glutamine synthetase3                     | X65930   | GRMZM2G046601    | 146062602 | chr9 | 146061102 | 146064101 | chr9:146061102-146064101 | 1  |
| <b>zmm8</b>   | Zea mays MADS8                            | Y09303   | GRMZM2G102161    | 146679028 | chr9 | 146677528 | 146680527 | chr9:146677528-146680527 | 1  |
| <b>wc1</b>    | white cap1                                | DQ100346 | GRMZM2G057243    | 152092882 | chr9 | 152091382 | 152094381 | chr9:152091382-152094381 | -1 |
| <b>mads1</b>  | MADS1                                     | AF112148 | GRMZM2G171365    | 153812731 | chr9 | 153811231 | 153814230 | chr9:153811231-153814230 | 1  |
| <b>rld1</b>   | rolled leaf1                              | AY501430 | GRMZM2G109987    | 154650601 | chr9 | 154649101 | 154652100 | chr9:154649101-154652100 | -1 |
